# Supplementary material for: Anti-Double-Stranded DNA Isotypes and Anti-C1q Antibody Improve the Diagnostic Specificity of Systemic Lupus Erythematosus
Source: PubMed Central journal article supplement (PMC6180986; doi:10.1155/2018/4528547), 2018-09-27
Supplement: 4528547.f1.pdf [file 4528547.f1.pdf]

**Supplement Table 1.** Frequency of direct immunofluorescence results in presence or absence of anti-DNA antibody isotypes and anti-C1q antibody in SLE-LN patients.

| <i>Direct immunofluorescence assay</i> | <b><i>IgG- anti-dsDNA antibodies</i></b> |                                   |                        | <b><i>IgM- anti-dsDNA antibodies</i></b> |                                   |                        | <b><i>IgA- anti-dsDNA antibodies</i></b> |                                   |                        | <b><i>Anti-C1q antibodies</i></b> |                                   |                        |
|----------------------------------------|------------------------------------------|-----------------------------------|------------------------|------------------------------------------|-----------------------------------|------------------------|------------------------------------------|-----------------------------------|------------------------|-----------------------------------|-----------------------------------|------------------------|
|                                        | <b><i>Positive Result (%)</i></b>        | <b><i>Negative Result (%)</i></b> | <b><i>p value*</i></b> | <b><i>Positive Result (%)</i></b>        | <b><i>Negative Result (%)</i></b> | <b><i>p value*</i></b> | <b><i>Positive Result (%)</i></b>        | <b><i>Negative Result (%)</i></b> | <b><i>p value*</i></b> | <b><i>Positive Result (%)</i></b> | <b><i>Negative Result (%)</i></b> | <b><i>p value*</i></b> |
| IgA                                    | 65.0                                     | 12.5                              | ns                     | 30.0                                     | 47.5                              | ns                     | 30.0                                     | 47.5                              | 0.026                  | 32.5                              | 45                                | ns                     |
| C3                                     | 80.0                                     | 15.0                              | 0.004                  | 32.5                                     | 62.5                              | ns                     | 30.0                                     | 65.0                              | ns                     | 35.0                              | 60                                | ns                     |
| C4                                     | 60.5                                     | 7.9                               | 0.034                  | 23.7                                     | 44.7                              | ns                     | 23.7                                     | 44.7                              | ns                     | 26.3                              | 42.1                              | ns                     |
| C1q                                    | 80.0                                     | 17.5                              | 0.043                  | 32.5                                     | 65.0                              | ns                     | 30.0                                     | 67.5                              | ns                     | 35.0                              | 62.5                              | ns                     |

p\* = Chi-square-test, ns = not significant.

**Supplement Table 2.** Frequency of SLE clinical manifestations in presence or absence of anti-dsDNA antibody isotypes and anti-C1q antibody (N=96) .

| <i>Clinical variable</i>                 | <i>IgG- anti-dsDNA antibodies</i> |                            |                 | <i>IgM- anti-dsDNA antibodies</i> |                            |                 | <i>IgA- anti-dsDNA antibodies</i> |                            |                 | <i>Anti-C1q antibody</i>   |                            |                 |
|------------------------------------------|-----------------------------------|----------------------------|-----------------|-----------------------------------|----------------------------|-----------------|-----------------------------------|----------------------------|-----------------|----------------------------|----------------------------|-----------------|
|                                          | <i>Positive Result (%)</i>        | <i>Negative Result (%)</i> | <i>p value*</i> | <i>Positive Result (%)</i>        | <i>Negative Result (%)</i> | <i>p value*</i> | <i>Positive Result (%)</i>        | <i>Negative Result (%)</i> | <i>p value*</i> | <i>Positive Result (%)</i> | <i>Negative Result (%)</i> | <i>p value*</i> |
| Central nervous system involvement (n=6) | 4.2                               | 2.1                        | ns              | 4.2                               | 2.1                        | ns              | 3.1                               | 3.1                        | ns              | 1.0                        | 5.2                        | ns              |
| Skin rashes (n=35)                       | 25                                | 11.5                       | ns              | 18.8                              | 17.7                       | ns              | 16.7                              | 19.8                       | ns              | 12.5                       | 24.0                       | ns              |
| Arthritis (n=8)                          | 6.3                               | 2.1                        | ns              | 5.2                               | 3.1                        | ns              | 2.1                               | 6.3                        | ns              | 3.1                        | 5.2                        | ns              |
| Serositis (n=39)                         | 29.2                              | 11.5                       | 0.027           | 20.8                              | 19.8                       | ns              | 19.8                              | 20.8                       | 0.008           | 15.6                       | 25                         | ns              |
| Hematological manifestations (n=15)      | 14.6                              | 1.0                        | 0.037           | 6.3                               | 9.4                        | ns              | 5.2                               | 10.4                       | ns              | 8.3                        | 7.3                        | 0.025           |
| Anemia (n=27)                            | 22.9                              | 5.2                        | ns              | 15.6                              | 12.9                       | ns              | 15.6                              | 12.9                       | 0.004           | 13.5                       | 14.6                       | 0.017           |
| Leukopenia (n=27)                        | 21.9                              | 6.3                        | ns              | 15.6                              | 12.5                       | ns              | 12.5                              | 15.6                       | ns              | 11.5                       | 16.7                       | ns              |
| Thrombocytopenia (n=27)                  | 21.9                              | 6.5                        | ns              | 13.5                              | 14.6                       | ns              | 10.8                              | 17.7                       | ns              | 11.5                       | 16.7                       | ns              |

p\* = Chi-square-test, ns = not significant.
